# Supplementary material for: The Synthesis and Initial Evaluation of MerTK Targeted PET Agents
Source: MDPI journal article supplement (doi:10.3390/molecules27051460), 2022-02-22
Supplement: s1 [file s1]

# Supporting Information

## The Synthesis and Initial Evaluation of MerTK Targeted PET Agents

Li Wang<sup>1,†</sup>, Yubai Zhou<sup>2,†</sup>, Xuedan Wu<sup>1</sup>, Xinrui Ma<sup>1</sup>, Bing Li<sup>2</sup>, Ransheng Ding<sup>2</sup>, Michael A. Stashko<sup>2</sup>, Zhanhong Wu<sup>1,\*</sup>,  
Xiaodong Wang<sup>2,\*</sup>, and Zibo Li<sup>1</sup>

### Contents

|                                                               |   |
|---------------------------------------------------------------|---|
| Figure.S1: <sup>1</sup> H NMR spectra of <b>UNC5650</b> ..... | 2 |
| Figure.S2: <sup>1</sup> H NMR spectra of <b>UNC6429</b> ..... | 3 |
| Figure.S3: <sup>1</sup> H NMR spectra of <b>MerTK-1</b> ..... | 4 |
| Figure.S4: <sup>1</sup> H NMR spectra of <b>MerTK-2</b> ..... | 5 |
| Figure.S5: <sup>1</sup> H NMR spectra of <b>MerTK-4</b> ..... | 6 |
| Figure.S6: <sup>1</sup> H NMR spectra of <b>MerTK-5</b> ..... | 7 |
| Figure.S7: <sup>1</sup> H NMR spectra of <b>MerTK-6</b> ..... | 8 |



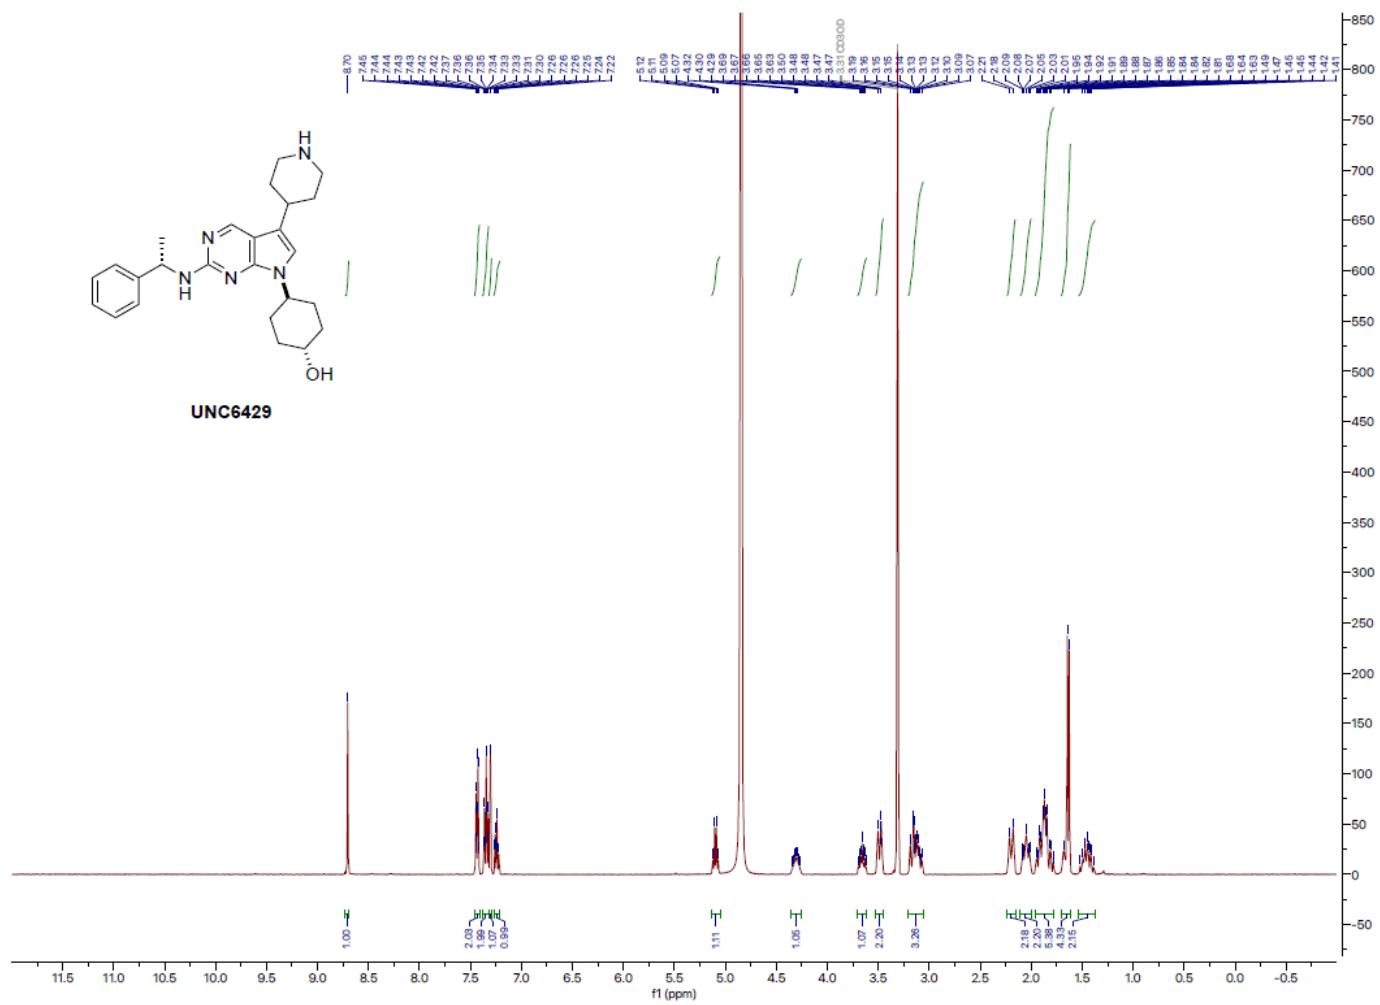

Figure S2 <sup>1</sup>H NMR spectra of UNC6429

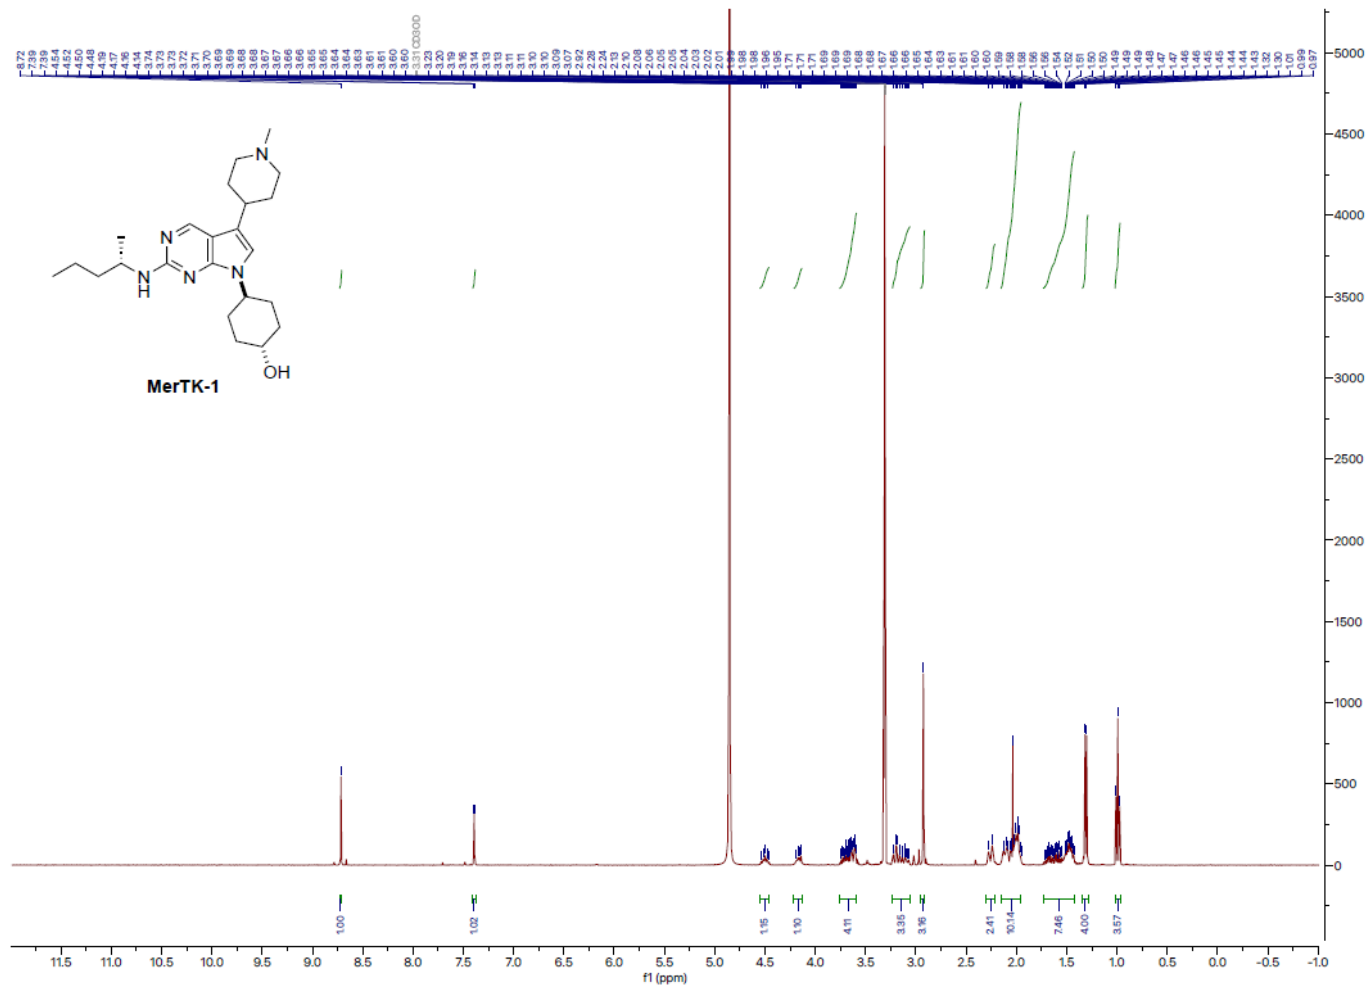

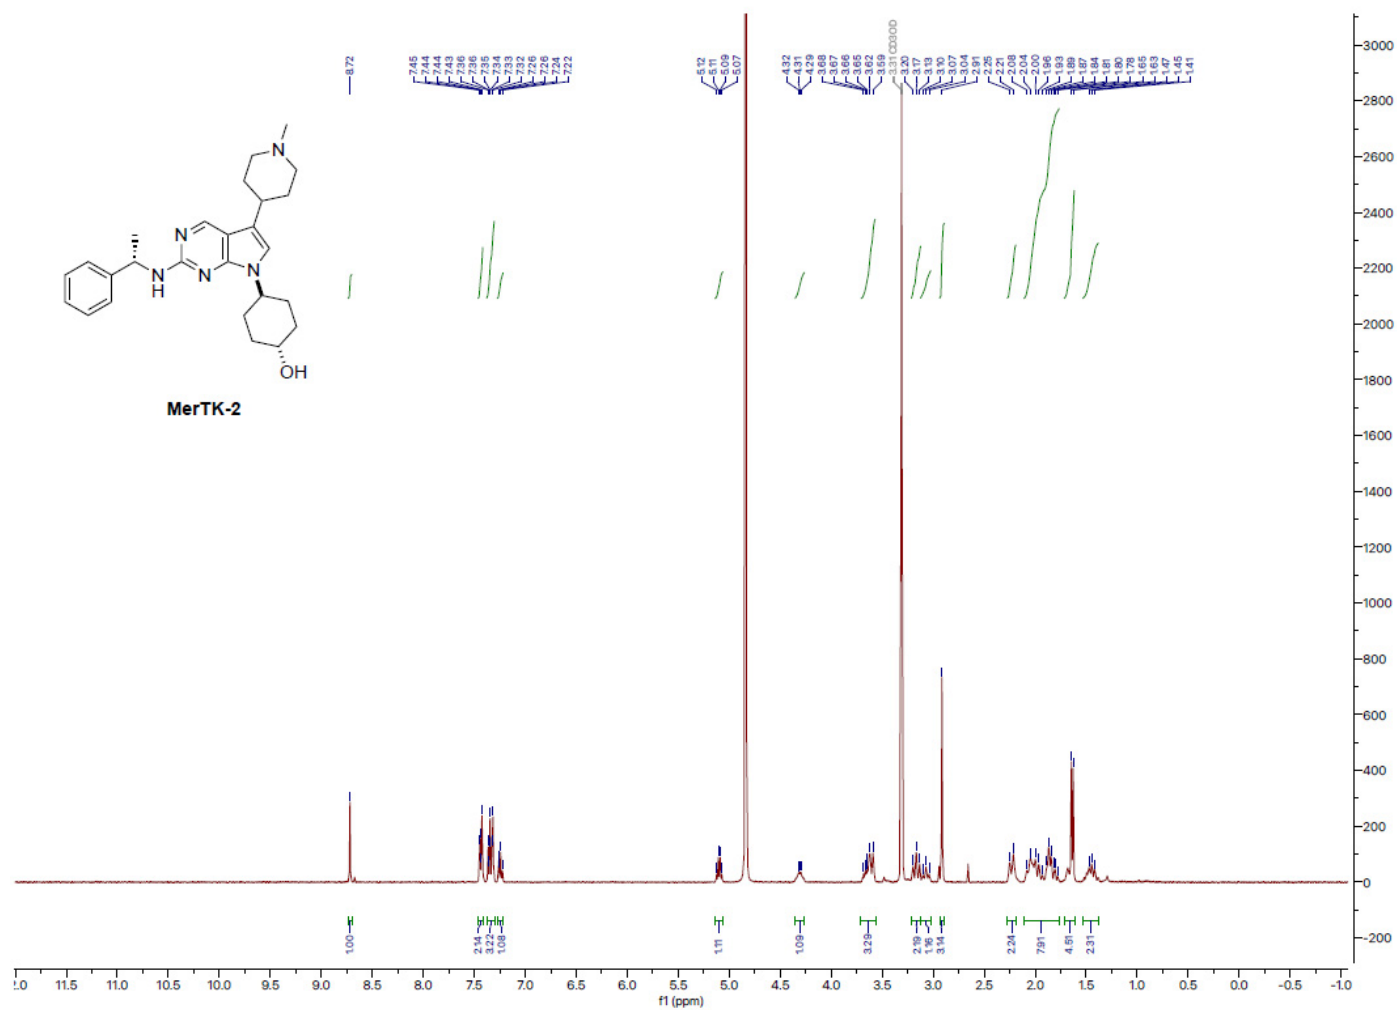

Figure S4  $^1\text{H}$  NMR spectra of MerTK-2

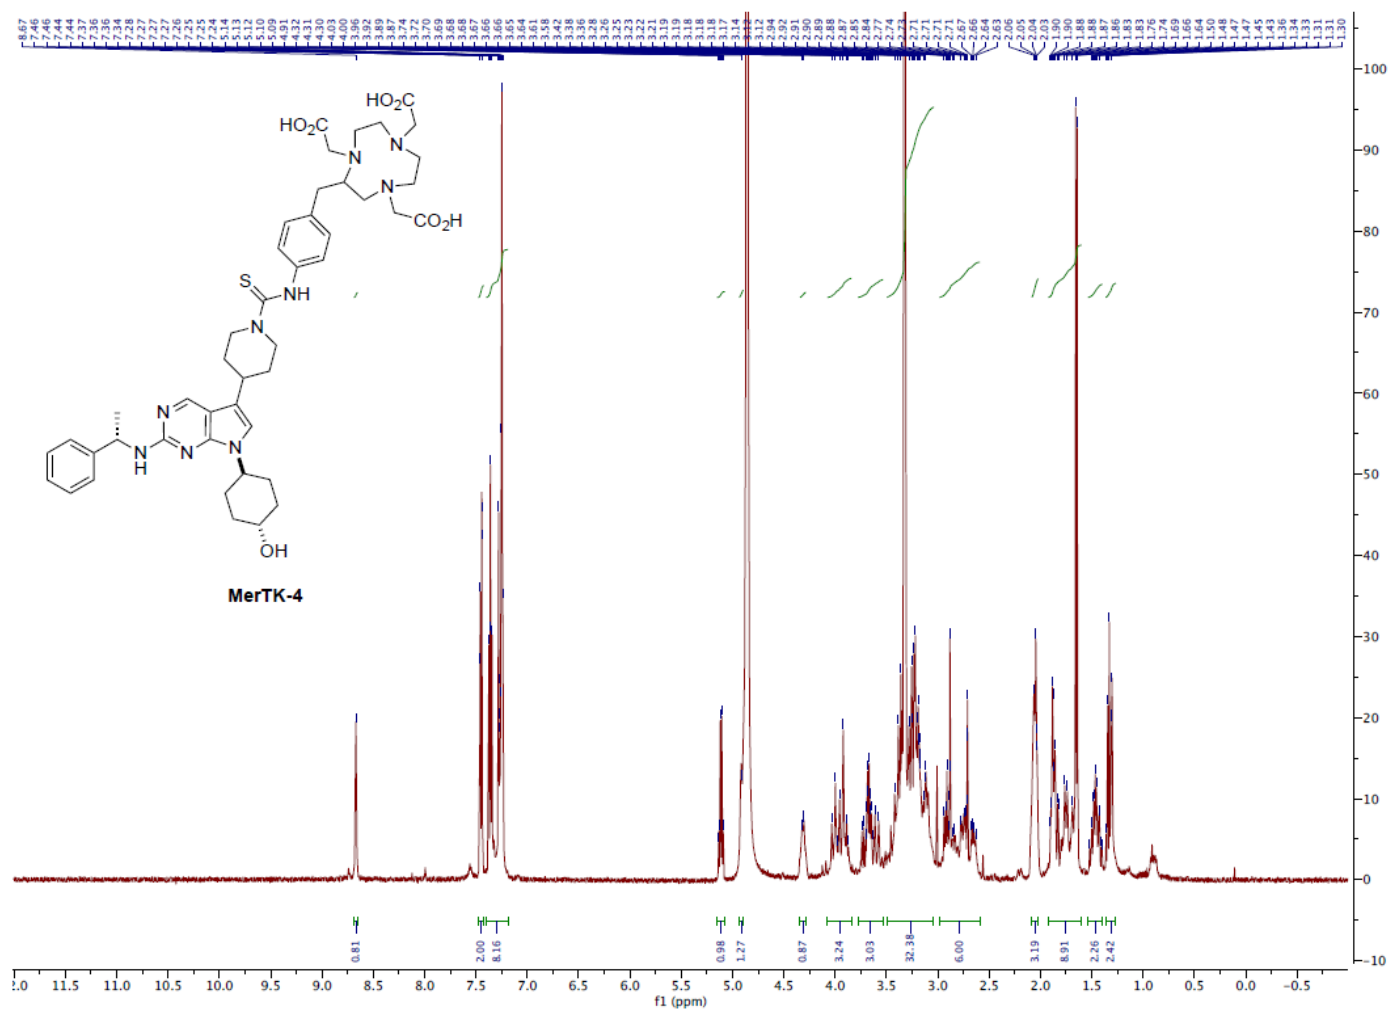

Figure S5 <sup>1</sup> H NMR spectra of MerTK-4

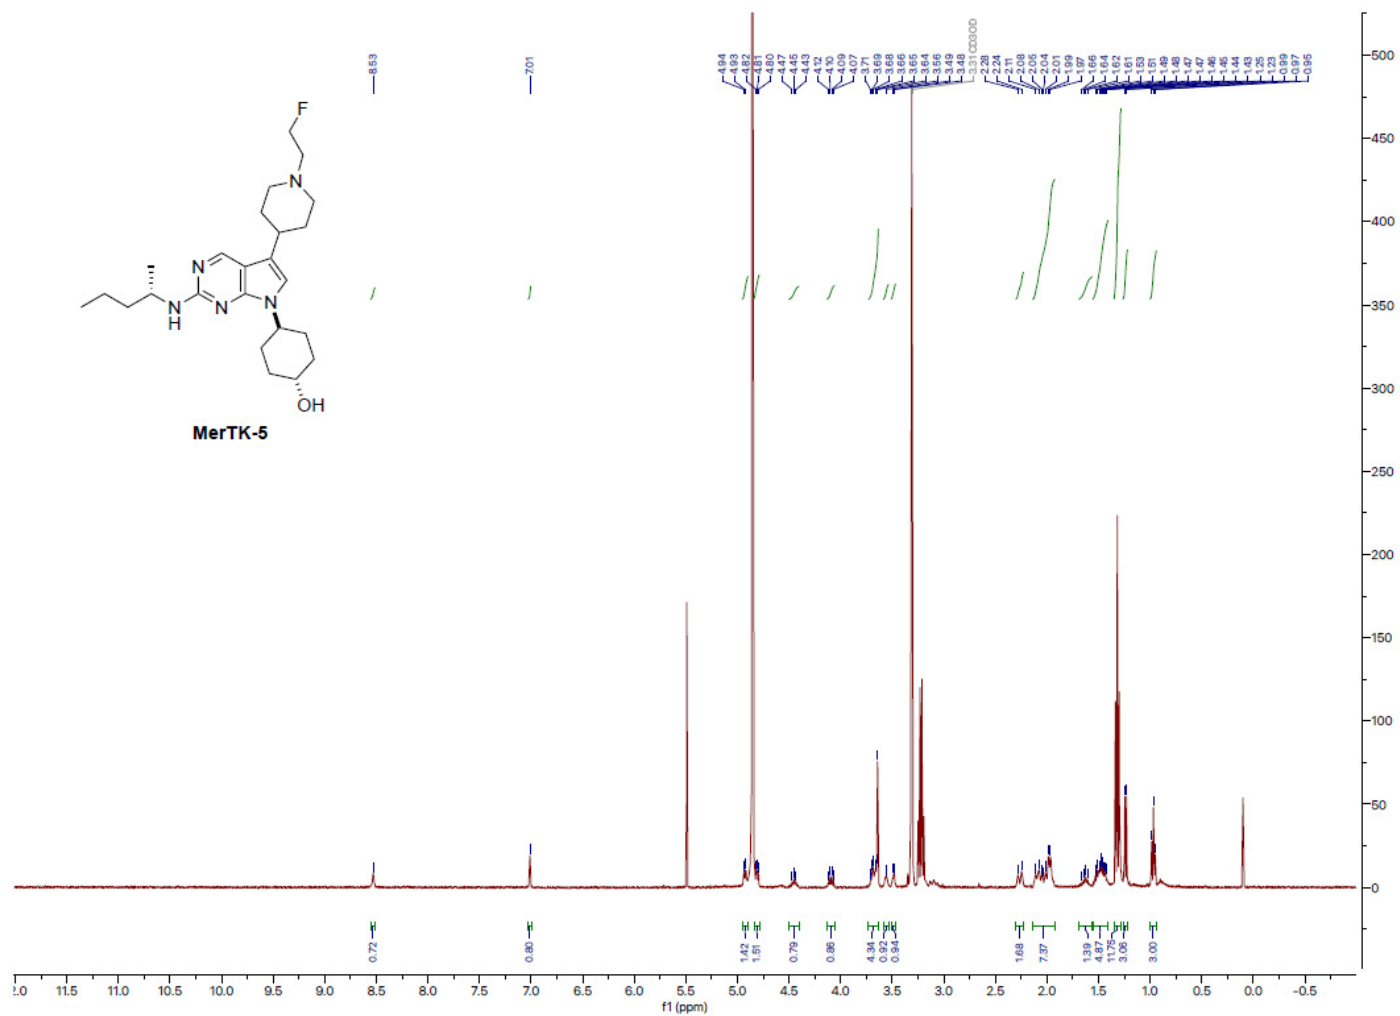

Figure S6  $^1\text{H}$  NMR spectra of MerTK-5

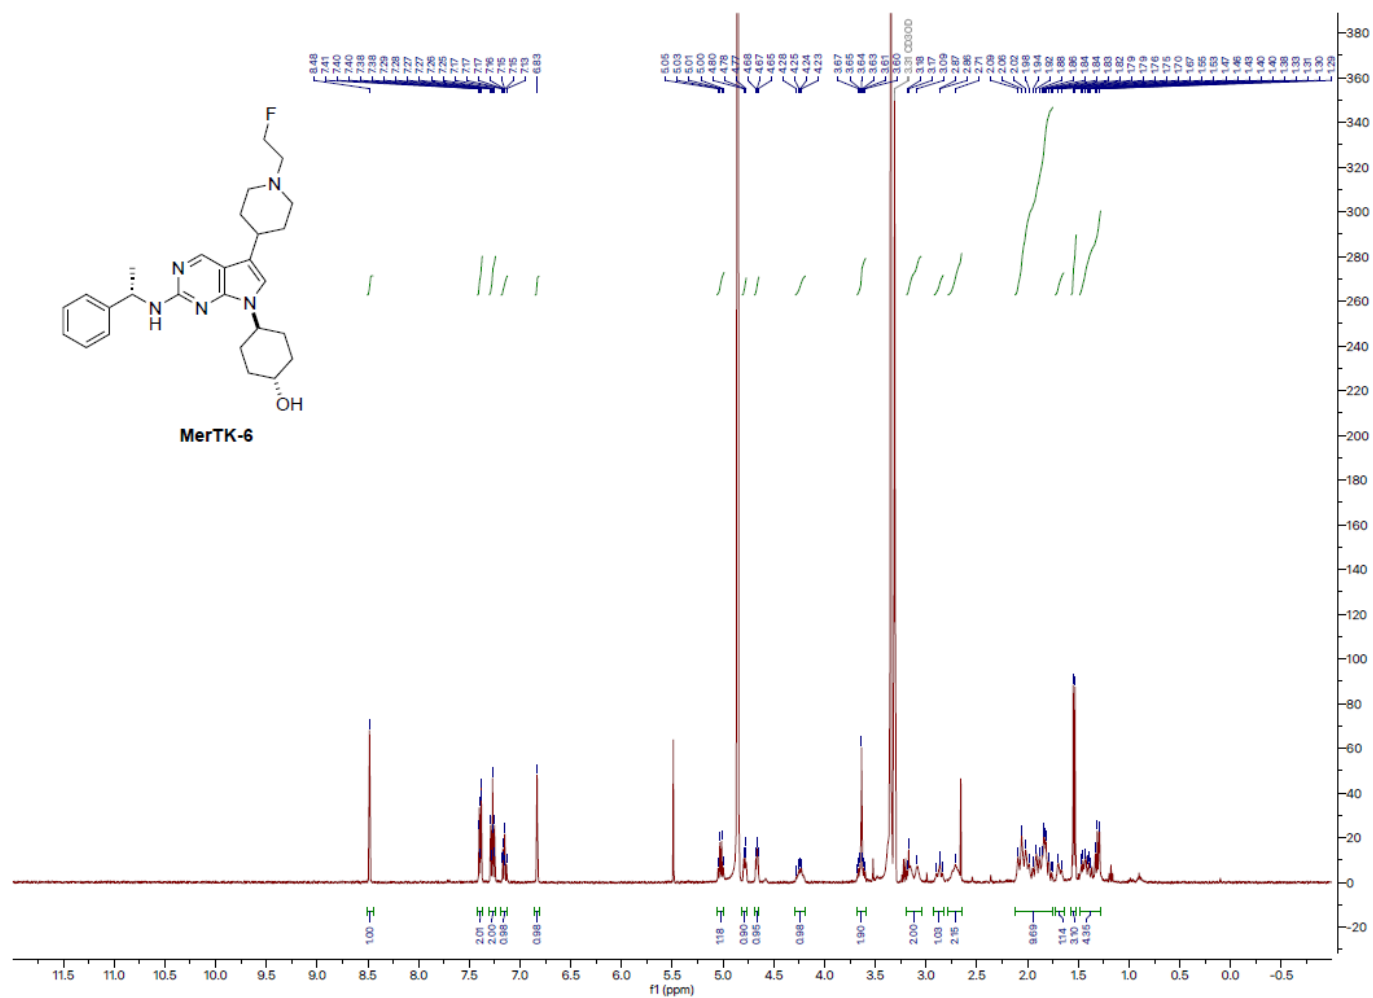

Figure S7 <sup>1</sup>H NMR spectra of MerTK-6
